# Supplementary material
Source: publisher site journal article supplement (https://www.dovepress.com/article/95279)
Supplement: Supplementary file 1 [file get_supplementary_file.php]

---

**Supplementary Table 1** The primers and probes for mRNA levels of the *HOXA9*, *MEIS1* and *ABL1* gene

---

| Gene         | Designation    | Sequence(5'-3') and labelling |
|--------------|----------------|-------------------------------|
| <i>ABL1</i>  | Forward Primer | AGGCTGCCCAGAGAAGGTCTA         |
| <i>ABL1</i>  | Reverse Primer | TGTTTCAAAGGCTTGGTGGAT         |
| <i>ABL1</i>  | FAM-MGB probe  | TGGAATCCCTCTGACCGG            |
| <i>HOXA9</i> | Forward Primer | GCCGGCCTTATGGCATTAA           |
| <i>HOXA9</i> | Reverse Primer | TGGAGGAGAACCACAAGCATAGT       |
| <i>HOXA9</i> | FAM-MGB probe  | CCTGAACCGCTGTCGGCCAGAA        |
| <i>MEIS1</i> | Forward Primer | ACGGGACTCACCATCCTTCA          |
| <i>MEIS1</i> | Reverse Primer | CTTGACTTACTGCTCGGTTGGA        |
| <i>MEIS1</i> | FAM-MGB probe  | AACAATTGGTTTATTAATGCCCGG      |

---
