# Supplementary material
Source: publisher site journal article supplement (https://www.dovepress.com/article/95279)
Supplement: Supplementary file 2 [file get_supplementary_file.php]

---

**Supplementary Table 2** The primers of gene mutations

---

| Gene          | Primer F(5'-3')            | Primer R(5'-3')             |
|---------------|----------------------------|-----------------------------|
| <i>ASXL1</i>  | TGATGCTGCCTCGAGTTGTC       | TTGGTCAAACCCAGCTTCTGT       |
|               | AGAAGCTGGGTTTGACCAAAGA     | GTGGCTTTTCGGTGTGAACA        |
|               | CCCCGGCTTGAAGATCGT         | GTGAGTCCAAGTGTAGCCCTCTGT    |
|               | GGCACCACTTCCTGGGAAA        | TGCTTCAGAGTCTCCGTTGATTT     |
|               | GAGGCCACTAACCCACTTGTG      | CCCTTGGCCTGTAACATTGC        |
| <i>DNTM3A</i> | GAAGACCCCTGGAAGTCTACA      | GAAGTAGCGGGCCCTGTGT         |
|               | TCTACCGCCTCCTGCATGAT       | TGGGTGCTGATACTTCTCTCCAT     |
| <i>EZH2</i>   | CAGTTCGTGCCCTTGTGTGA       | GCCTGGCTGTATCTGTAATCAAAA    |
| <i>FLT3</i>   | TCCTGTTTCTCGGATGGATACC     | TGGGTCATCATCTTGAGTTCTGA     |
| <i>NRAS</i>   | GCCGCATGACTCGTGGTT         | GGCGTATTTCTCTTACCAGTGTGTAA  |
| <i>SF3B1</i>  | TCAACACTTAGTCCAGAAGAGCAAA  | ACTTTCTGCTGCTCATCCACAA      |
|               | GCCATCTTGCCACATCTTAGAAGT   | CCATCAATCAGTTGTTCTTCAAGTTT  |
|               | TCTTCCTCCCTTTTTTAAACACTTCT | GTGGAGTCATCTTATGCATACCTATGA |
| <i>SRSF2</i>  | CGACGCTGAGGACGCTATG        | AAGACCTACCCCAAATCCCATT      |

---

---

|               |                                                                               |                                                                              |
|---------------|-------------------------------------------------------------------------------|------------------------------------------------------------------------------|
| <i>TET2</i>   | ATCACTCACCCATCGCATAACC<br>ATGACATACAGACTGCAGGGACAA<br>CCAGTGTTGAAACAGCACTTGAA | TCATTGTCCCTGCAGTCTGTATGT<br>TGTTGCAAAAGGTGTGAGTTTGA<br>GGCACAGGAAAAACATTTGCA |
| <i>UTX</i>    | CTCTTTGGGTTTCGTGAGATTCA<br>CTTTGTCCAATGCTGAAATTCAAT                           | AGTGTGATGCATCCAACCTAACTG<br>GGAAGGTTACACA ACTGAGCCTGTA                       |
| <i>KIT</i>    | TACATGGACATGAAACCTGGAGTT                                                      | AATGGTCTACCACGGGCTTCT                                                        |
| <i>TP53</i>   | CTTGCCGTCCCAAGCAAT<br>CCGAGTGGAAGGAAATTTGC                                    | TGGGCCTCCGGTTCATG<br>GGAGGTAGACTGACCCTTTTTGG                                 |
| <i>NPM1</i>   | AGGAGGAGGATGTGAAACTCTTAAGTAT                                                  | AACACGGTAGGGAAAGTTCTCACT                                                     |
| <i>SETBP1</i> | CAGTCACTTGTGGCGTCTTCA                                                         | TATGGATTCTCGTGGTAGAAGGTGTA                                                   |
| <i>CEBPA</i>  | AAGAAGTCGGTGGACAAGAACAG                                                       | GCAGGCGGTCATTGTCACT                                                          |
| <i>MLL</i>    | GTCATCAATTGCTGGCTCAGAA                                                        | GGATGTTCAAAGTGCCTGCAT                                                        |
| <i>RUNX1</i>  | GTCATTTCTTCGTACCCACAGT                                                        | GTGTGGGCTGACCCTCATG                                                          |
| <i>HOXA9</i>  | GGGCAACTACTACGTGGACT<br>TGGCATTAAACCTGAACCGC                                  | TTGTTTTTCAGAGAAGGCGCC<br>TGCCTTGGAAAAGATGTGGC                                |

---

---

*MEIS1*

AGTAGGAAGGGAGCCAGAGA

CCAAGAGGGCTGGTCAGTTA

TGGGCTCCTCTGTCAATGAC

CTGTTGTCCAAGCCATCACC

ATGACACGGCATCTACTCGT

CCCCTCCATGCCCATATTCA

---
