# Supplementary material
Source: publisher site journal article supplement (https://www.dovepress.com/article/95279)
Supplement: Supplementary file 3 [file get_supplementary_file.php]

**Supplementary Table 3** *HOXA9* mutations and functional consequences

| <b>Sample Number</b> | <b>FAB</b>       | <b>HOXA9 mRNA levels</b> | <b>Mutation</b> | <b>Consequence</b> |
|----------------------|------------------|--------------------------|-----------------|--------------------|
| <b>1</b>             | M5               | 0                        | c.574 G>A       | p.D192N            |
| <b>2</b>             | M4               | 3.23%                    | c.23 G>A        | p. G8D             |
| <b>3</b>             | M2               | 16.32%                   | c.190 G>T       | p. G64C            |
| <b>4</b>             | M5               | 32.5%                    | c.283 delC      | p. Q95fs*60        |
| <b>5</b>             | M2               | 35.6%                    | c.280 C>A       | p. P94T            |
| <b>6</b>             | M2               | 58.81%                   | c.681 C>T       | p.F227F            |
| <b>7</b>             | M4               | 86.3%                    | c.280 C>A       | p. P94T            |
| <b>8</b>             | M4               | 99%                      | c.23 G>A        | p. G8D             |
| <b>9</b>             | Unclassified AML | 126.51%                  | c.23 G>A        | p. G8D             |
| <b>10</b>            | M5               | 185.1%                   | c.617C>A        | P.T206N            |
| <b>11</b>            | M2               | 196.54%                  | c.574G>A        | p.D192N            |
