# Supplementary material
Source: publisher site journal article supplement (https://www.dovepress.com/article/95279)
Supplement: Supplementary file 4 [file get_supplementary_file.php]

**Supplementary Table 4** *MEIS1* mutations and functional consequences

| <b>Sample Number</b> | <b>FAB</b>       | <b><i>MEIS1</i> mRNA levels</b> | <b>Mutation</b> | <b>Consequence</b> |
|----------------------|------------------|---------------------------------|-----------------|--------------------|
| <b>1</b>             | M2               | 16.5%                           | c.1076 T>C      | p.V359A            |
| <b>2</b>             | M4               | 45.6%                           | c.25 C>T        | p. P9S             |
| <b>3</b>             | Unclassified AML | 26.41%                          | c.187 A>G       | p. M63V            |
| <b>4</b>             | M4               | 61.6%                           | c.299 delC      | p. R102fs*20       |
| <b>5</b>             | M6               | 59.6%                           | c.240 A>G       | p. G80G            |
| <b>6</b>             | M2               | 92.53%                          | c.1118 C>A      | p.P373H            |
| <b>7</b>             | M4               | 0.52%                           | c.871 C>T       | p. L291L           |
| <b>8</b>             | M2               | 29.53%                          | c.1118C>A       | p. P373H           |
| <b>9</b>             | M5               | 249.5%                          | c.700 G>A       | p. G234S           |
