# Supplementary material
Source: publisher site journal article supplement (https://www.dovepress.com/article/95279)
Supplement: Supplementary file 5 [file get_supplementary_file.php]

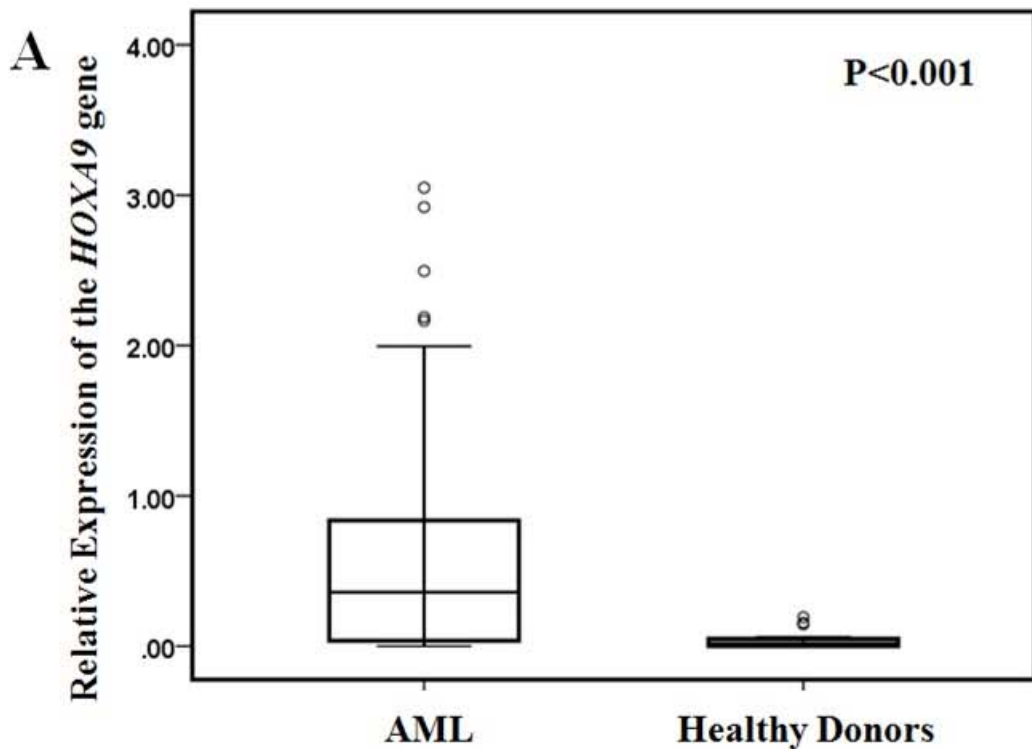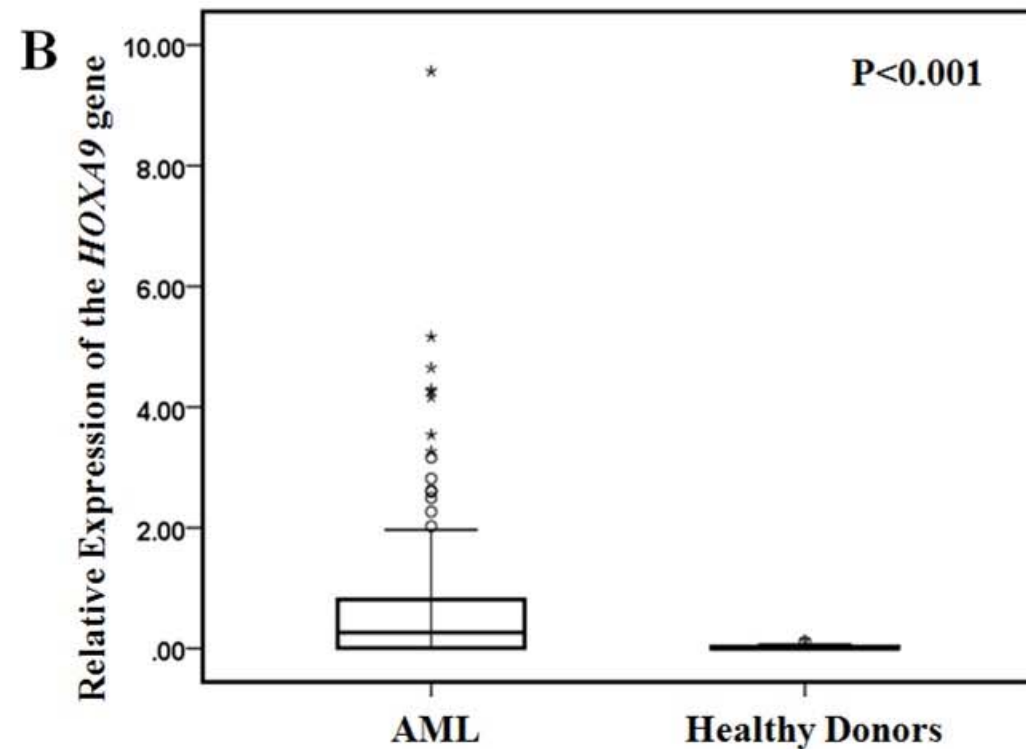

Supplementary Figure Relative expression of the *HOXA9* and *MEIS1* gene in acute myeloid leukemia (AML).

Note: A. Rank sum analysis revealed a significantly lower *HOXA9* expression in the healthy bone marrow compared with that of patients with AML ( $P < 0.001$ ). B. Rank sum analysis revealed a remarkably lower *MEIS1* expression in the healthy bone marrow compared with that of patients with AML ( $P < 0.001$ ).
